# Supplementary material
Source: MDPI journal article supplement (https://www.mdpi.com/2073-4441/15/1/120)
Supplement: s1 [file s1]

# **Supplementary Information for**

## **Effects of Ammonium and COD on Fe and Mn Release from RBF Sediment Based on Column Experiment**

**Xuelian Xia, Yanguo Teng \* and Yuanzheng Zhai \***

Engineering Research Center of Groundwater Pollution Control and Remediation of Ministry of Education of China, College of Water Sciences, Beijing Normal University, Beijing 100875, China

\* Correspondence: ygteng@bnu.edu.cn (Y.T.); zyz@bnu.edu.cn (Y.Z.); Tel.: +86-010-58802738 (Y.T.); +86-010-58802736 (Y.Z.)

### **Additional tables**

**Table S1.** The average value of pH, DO concentration and Eh over time.

**Table S2** The average value of Fe and Mn concentration over time.

**Table S3.** The proportion of microbial community abundance in sediment samples of different soil columns.

**Table S1.** The average value of pH, DO concentration and Eh over time.

| Time | Column A |           |         | Column B |           |         | Column C |           |         |
|------|----------|-----------|---------|----------|-----------|---------|----------|-----------|---------|
| (h)  | pH       | DO (mg/L) | Eh (mv) | pH       | DO (mg/L) | Eh (mv) | pH       | DO (mg/L) | Eh (mv) |
| 0    | 6.11     | 12.60     | 210.78  | 7.06     | 11.97     | 209.00  | 5.52     | 13.44     | 207.20  |
| 4    | 7.19     | 9.67      | 193.52  | 7.06     | 11.67     | 193.40  | 5.75     | 11.94     | 220.86  |
| 6    | 7.05     | 13.56     | 184.84  | 7.01     | 11.67     | 185.28  | 6.06     | 12.32     | 193.40  |
| 10   | 7.57     | 8.48      | 218.80  | 6.97     | 11.19     | 217.24  | 6.24     | 12.56     | 185.28  |
| 12   | 7.52     | 8.67      | 216.78  | 6.68     | 10.59     | 216.78  | 6.17     | 12.79     | 217.24  |
| 14   | 7.65     | 8.32      | 212.60  | 6.74     | 9.86      | 212.60  | 6.23     | 9.06      | 216.78  |
| 22   | 7.44     | 10.39     | 216.00  | 6.80     | 11.30     | 230.42  | 6.29     | 7.61      | 224.52  |
| 30   | 6.82     | 9.55      | 269.46  | 6.75     | 11.39     | 234.24  | 6.23     | 7.71      | 214.52  |
| 37   | 6.89     | 8.15      | 241.96  | 6.70     | 12.58     | 228.80  | 6.30     | 7.99      | 227.40  |
| 46   | 6.94     | 7.68      | 234.98  | 6.62     | 10.28     | 213.20  | 6.16     | 8.58      | 231.20  |
| 53   | 6.95     | 7.79      | 234.00  | 6.40     | 16.65     | 199.34  | 6.14     | 8.75      | 221.54  |
| 60   | 6.47     | 8.51      | 240.74  | 7.00     | 15.82     | 178.80  | 6.35     | 17.97     | 202.36  |
| 84   | 6.24     | 8.53      | 209.92  | 6.93     | 10.30     | 176.26  | 6.16     | 11.40     | 187.72  |
| 95   | 6.26     | 12.48     | 214.74  | 6.41     | 9.25      | 227.20  | 6.09     | 10.45     | 185.72  |
| 107  | 6.48     | 11.58     | 206.12  | 6.54     | 16.69     | 240.48  | 6.12     | 13.56     | 209.64  |
| 118  | 6.64     | 10.42     | 202.84  | 6.54     | 15.83     | 226.88  | 6.03     | 14.71     | 180.48  |
| 130  | 6.63     | 16.58     | 245.34  | 6.47     | 13.48     | 229.40  | 6.29     | 13.98     | 198.22  |
| 142  | 6.75     | 15.92     | 225.64  | 6.18     | 12.28     | 242.04  | 6.34     | 13.92     | 195.68  |
| 154  | 6.87     | 16.04     | 210.54  | 6.55     | 11.52     | 264.60  | 6.11     | 13.93     | 192.68  |
| 166  | 6.83     | 15.77     | 203.84  | 6.61     | 11.16     | 286.74  | 6.05     | 16.95     | 178.20  |
| 190  | 6.69     | 16.32     | 236.06  | 6.57     | 11.50     | 219.46  | 5.99     | 16.58     | 174.58  |
| 214  | 6.74     | 15.18     | 259.80  | 6.56     | 11.89     | 216.80  | 6.17     | 10.18     | 220.96  |
| 238  | 6.73     | 13.28     | 209.08  | 6.23     | 12.24     | 252.78  | 6.02     | 11.31     | 222.58  |
| 262  | 6.75     | 14.23     | 224.00  | 6.07     | 10.89     | 260.76  | 6.06     | 10.49     | 239.56  |
| 286  | 6.95     | 15.72     | 241.84  | 6.21     | 10.77     | 248.66  | 6.07     | 10.79     | 237.48  |
| 310  | 6.54     | 11.07     | 258.22  | 5.98     | 13.55     | 250.74  | 6.42     | 12.08     | 243.28  |
| 334  | 7.13     | 11.02     | 248.72  | 6.12     | 15.40     | 259.82  | 6.26     | 10.37     | 248.22  |
| 358  | 6.62     | 10.06     | 246.32  | 6.30     | 10.89     | 237.00  | 6.02     | 10.40     | 239.08  |
| 382  | 6.85     | 10.36     | 244.58  | 6.26     | 11.82     | 245.42  | 6.19     | 13.17     | 247.76  |
| 406  | 6.84     | 10.79     | 238.90  | 6.29     | 9.77      | 239.02  | 6.29     | 14.32     | 226.04  |
| 454  | 6.56     | 10.30     | 252.02  | 6.37     | 10.70     | 223.72  | 6.25     | 10.31     | 242.62  |
| 516  | 6.96     | 12.70     | 239.84  | 6.39     | 11.64     | 216.80  | 6.08     | 11.26     | 211.04  |
| 564  | 6.56     | 10.55     | 240.28  | 6.24     | 10.65     | 250.68  | 6.21     | 13.22     | 198.82  |
| 612  | 7.09     | 7.09      | 205.80  | 6.34     | 11.76     | 264.14  | 6.27     | 13.83     | 202.60  |
| 646  | 7.11     | 7.11      | 209.48  | 6.45     | 10.12     | 271.28  | 6.29     | 12.24     | 218.06  |
| 660  | 7.02     | 8.28      | 209.40  | 6.42     | 9.98      | 258.20  | 6.24     | 12.10     | 258.20  |
| 694  | 7.12     | 9.48      | 226.60  | 6.48     | 10.16     | 244.00  | 6.14     | 12.12     | 244.00  |
| 742  | 7.09     | 10.92     | 231.40  | 6.47     | 10.40     | 231.60  | 6.25     | 12.04     | 231.60  |

**Table S2** The average value of Fe and Mn concentration over time.

| Time<br>(h) | Column A  |           | Column B  |           | Column C  |           |
|-------------|-----------|-----------|-----------|-----------|-----------|-----------|
|             | Fe (mg/L) | Mn (µg/L) | Fe (mg/L) | Mn (µg/L) | Fe (mg/L) | Mn (µg/L) |
| 0           | 0.027     | 1.488     | 0.034     | 6.906     | 0.028     | 5.258     |
| 4           | 0.025     | 1.612     | 0.051     | 5.370     | 0.025     | 3.692     |
| 6           | 0.033     | 1.880     | 0.060     | 5.902     | 0.024     | 5.520     |
| 10          | 0.038     | 2.020     | 0.052     | 6.000     | 0.031     | 4.880     |
| 12          | 0.045     | 2.600     | 0.065     | 5.024     | 0.031     | 6.504     |
| 14          | 0.048     | 3.120     | 0.076     | 4.442     | 0.029     | 9.000     |
| 22          | 0.049     | 3.440     | 0.083     | 4.804     | 0.033     | 8.672     |
| 30          | 0.057     | 3.280     | 0.071     | 6.820     | 0.045     | 9.600     |
| 37          | 0.061     | 3.360     | 0.083     | 3.535     | 0.054     | 10.530    |
| 46          | 0.063     | 3.460     | 0.080     | 3.712     | 0.074     | 10.510    |
| 53          | 0.057     | 3.700     | 0.108     | 4.164     | 0.071     | 10.800    |
| 60          | 0.059     | 3.920     | 0.104     | 3.880     | 0.092     | 9.477     |
| 84          | 0.058     | 3.820     | 0.113     | 4.060     | 0.135     | 11.000    |
| 95          | 0.061     | 4.240     | 0.123     | 3.738     | 0.140     | 9.146     |
| 107         | 0.062     | 4.160     | 0.132     | 3.502     | 0.140     | 11.400    |
| 118         | 0.063     | 4.260     | 0.144     | 4.072     | 0.166     | 12.200    |
| 130         | 0.062     | 4.420     | 0.172     | 3.936     | 0.178     | 16.200    |
| 142         | 0.062     | 4.480     | 0.142     | 4.824     | 0.220     | 18.400    |
| 154         | 0.059     | 4.260     | 0.150     | 6.432     | 0.213     | 22.400    |
| 166         | 0.058     | 4.180     | 0.166     | 7.102     | 0.200     | 22.600    |
| 190         | 0.054     | 3.860     | 0.200     | 8.782     | 0.254     | 22.800    |
| 214         | 0.050     | 3.780     | 0.196     | 10.174    | 0.212     | 19.800    |
| 238         | 0.052     | 3.440     | 0.205     | 15.078    | 0.160     | 20.600    |
| 262         | 0.048     | 2.832     | 0.201     | 12.636    | 0.199     | 24.200    |
| 286         | 0.050     | 2.720     | 0.211     | 11.158    | 0.140     | 21.200    |
| 310         | 0.046     | 2.540     | 0.165     | 14.464    | 0.134     | 16.004    |
| 334         | 0.040     | 2.500     | 0.139     | 14.988    | 0.079     | 15.524    |
| 358         | 0.038     | 2.500     | 0.141     | 20.454    | 0.098     | 17.516    |
| 382         | 0.031     | 2.320     | 0.140     | 29.546    | 0.076     | 16.226    |
| 406         | 0.023     | 2.184     | 0.134     | 29.960    | 0.114     | 15.196    |
| 454         | 0.024     | 2.154     | 0.106     | 46.620    | 0.090     | 20.680    |
| 516         | 0.023     | 2.100     | 0.128     | 26.600    | 0.087     | 18.288    |
| 564         | 0.023     | 2.510     | 0.124     | 28.400    | 0.071     | 16.772    |
| 612         | 0.021     | 2.155     | 0.120     | 31.600    | 0.071     | 16.600    |
| 646         | 0.021     | 2.198     | 0.110     | 31.800    | 0.068     | 14.200    |
| 660         | 0.021     | 2.214     | 0.120     | 32.200    | 0.083     | 16.600    |
| 694         | 0.027     | 1.488     | 0.034     | 6.906     | 0.028     | 5.258     |
| 742         | 0.025     | 1.612     | 0.051     | 5.370     | 0.025     | 3.692     |

**Table S3.** The proportion of microbial community abundance in sediment samples of different soil columns.

| Colum A          | Phylum |       |       |       |       |                    | Genus |       |       |       |       |
|------------------|--------|-------|-------|-------|-------|--------------------|-------|-------|-------|-------|-------|
|                  | A1     | A2    | A3    | A4    | A5    |                    | A1    | A2    | A3    | A4    | A5    |
| Actinobacteriota | 40.56  | 36.77 | 23.10 | 28.65 | 45.64 | Delftia            | 31.83 | 51.95 | 49.47 | 40.96 | 24.66 |
| Proteobacteria   | 11.42  | 23.48 | 45.55 | 32.86 | 44.07 | Rhodococcus        | 10.10 | 2.80  | 0.20  | 1.27  | 7.04  |
| Acidobacteriota  | 15.20  | 9.17  | 3.26  | 6.96  | 1.43  | MB-A2-108          | 11.21 | 4.97  | 0.23  | 2.90  | 13.79 |
| Chloroflexi      | 10.79  | 7.18  | 5.55  | 14.19 | 2.73  | Gaiellales         | 3.37  | 18.00 | 4.54  | 14.95 | 2.30  |
| Firmicutes       | 5.32   | 4.18  | 11.36 | 1.12  | 1.99  | Ochrobactrum       | 11.64 | 4.82  | 1.15  | 3.84  | 22.47 |
| Bacteroidota     | 0.86   | 4.22  | 1.56  | 3.54  | 3.14  | Subgroup_7         | 5.49  | 5.06  | 0.45  | 0.67  | 5.76  |
| Gemmatimonadota  | 3.50   | 2.44  | 3.32  | 2.74  | 0.00  | Vicinamibacterales | 0.08  | 0.18  | 0.14  | 0.11  | 0.00  |
| Methyloirabilota | 4.84   | 2.41  | 0.15  | 0.02  | 0.00  | Pseudarthrobacter  | 11.78 | 3.13  | 0.71  | 1.92  | 10.54 |
| Myxococcota      | 1.29   | 1.69  | 2.45  | 2.55  | 0.00  | KD4-96             | 14.49 | 7.82  | 0.66  | 0.52  | 13.43 |
| Nitrospirota     | 1.56   | 1.20  | 0.28  | 0.33  | 0.00  | Gaiella            | 0.00  | 0.75  | 0.12  | 0.06  | 0.01  |
| others           | 4.67   | 7.26  | 3.43  | 7.04  | 1.00  | other              | 0.00  | 0.53  | 42.31 | 32.79 | 0.00  |
| Colum B          | B1     | B2    | B3    | B4    | B5    |                    | B1    | B2    | B3    | B4    | B5    |
| Proteobacteria   | 34.77  | 30.31 | 18.26 | 19.56 | 21.49 | Pseudomonas        | 28.11 | 29.37 | 31.79 | 27.83 | 25.70 |
| Actinobacteria   | 12.50  | 16.06 | 4.71  | 13.23 | 27.45 | Acinetobacter      | 28.31 | 24.07 | 4.85  | 7.76  | 1.67  |
| Acidobacteria    | 16.52  | 17.04 | 11.84 | 29.71 | 1.49  | Sphingobium        | 21.77 | 14.61 | 14.89 | 17.93 | 15.56 |
| Chloroflexi      | 20.25  | 15.49 | 22.48 | 15.60 | 3.25  | Ochrobactrum       | 2.87  | 4.53  | 8.65  | 7.46  | 9.26  |
| Firmicutes       | 1.66   | 2.08  | 15.27 | 2.63  | 34.82 | Streptomyces       | 0.13  | 3.20  | 5.27  | 9.38  | 3.28  |
| Gemmatimonadetes | 0.50   | 2.80  | 2.18  | 0.60  | 7.62  | Sphingomonas       | 7.55  | 4.19  | 4.87  | 4.15  | 1.81  |
| Verrucomicrobia  | 8.34   | 3.62  | 0.33  | 5.10  | 0.00  | Denitratisoma      | 2.28  | 2.59  | 5.82  | 4.54  | 6.02  |
| Nitrospirae      | 0.71   | 4.22  | 0.28  | 4.98  | 0.00  | Nitrosomomas       | 6.67  | 9.16  | 3.70  | 0.85  | 0.54  |
| Bacteroidetes    | 1.09   | 1.62  | 0.49  | 1.70  | 0.00  | Vicinamibacterales | 1.89  | 3.49  | 4.53  | 4.91  | 16.87 |

|                   |       |       |       |       |       |                   |       |       |       |       |       |
|-------------------|-------|-------|-------|-------|-------|-------------------|-------|-------|-------|-------|-------|
| AD3               | 0.38  | 1.28  | 0.44  | 1.25  | 0.00  | Pseudarthrobacter | 0.14  | 1.34  | 5.42  | 3.13  | 3.39  |
| others            | 3.26  | 5.47  | 23.71 | 5.64  | 3.88  | other             | 0.29  | 3.45  | 10.20 | 12.05 | 15.89 |
| Colum C           | C1    | C2    | C3    | C4    | C5    |                   | C1    | C2    | C3    | C4    | C5    |
| Proteobacteria    | 54.47 | 16.70 | 26.70 | 32.83 | 34.74 | Arthrobacter      | 29.76 | 32.90 | 33.15 | 28.78 | 25.31 |
| Actinobacteriota  | 15.22 | 42.09 | 34.55 | 34.08 | 31.14 | Paraburkholderia  | 28.72 | 11.18 | 20.14 | 28.67 | 23.32 |
| Bacteroidota      | 5.88  | 7.07  | 3.86  | 4.08  | 4.63  | Methylophilaceae  | 14.32 | 5.69  | 4.99  | 2.26  | 2.10  |
| Acidobacteriota   | 2.88  | 5.61  | 6.39  | 5.86  | 5.84  | Bradyrhizobium    | 0.34  | 9.39  | 6.09  | 16.26 | 16.35 |
| Myxococcota       | 9.14  | 4.40  | 2.66  | 3.60  | 4.48  | Massilia          | 3.05  | 9.75  | 7.48  | 9.67  | 12.21 |
| Verrucomicrobiota | 0.90  | 2.28  | 3.03  | 3.12  | 2.69  | Variovorax        | 3.35  | 13.40 | 13.89 | 2.26  | 3.61  |
| Patescibacteria   | 1.32  | 2.42  | 3.18  | 1.84  | 2.19  | Micropepsaceae    | 10.20 | 2.75  | 2.00  | 0.18  | 0.36  |
| Bacteria          | 1.76  | 2.37  | 1.33  | 3.66  | 3.61  | Desulfobacterota  | 1.87  | 5.69  | 4.37  | 3.78  | 6.73  |
| Gemmatimonadota   | 1.98  | 4.12  | 1.64  | 1.46  | 1.26  | Gallionella       | 5.58  | 3.46  | 2.39  | 0.46  | 1.05  |
| Chloroflexi       | 0.39  | 2.19  | 1.79  | 1.99  | 2.73  | Pseudolabrys      | 1.25  | 1.97  | 0.94  | 1.86  | 1.38  |
| others            | 6.06  | 10.76 | 14.86 | 7.49  | 6.70  | other             | 1.55  | 3.83  | 4.57  | 5.82  | 7.59  |
